# Supplementary material for: Phosphatidylinositol-3,4,5-trisphosphate interacts with alpha-synuclein and initiates its aggregation and formation of Parkinson’s disease-related fibril polymorphism
Source: Springer Nature journal article supplement (doi:10.1007/s00401-023-02555-3), 2023-03-20
Supplement: MOESM1 [file 24645922]

## **Phosphatidylinositol-3,4,5-trisphosphate interacts with alpha-synuclein and initiates its aggregation and formation of Parkinson's disease-related fibril polymorphism**

Chi-Jing Choong<sup>1,a</sup>, César Aguirre<sup>1,a</sup>, Keita Kakuda<sup>1,a</sup>, Goichi Beck<sup>a</sup>, Hiroki Nakanishi<sup>b</sup>, Yasuyoshi Kimura<sup>a</sup>, Shuichi Shimma<sup>c</sup>, Kei Nabekura<sup>a</sup>, Makoto Hideshima<sup>a</sup>, Junko Doi<sup>a</sup>, Keiichi Yamaguchi<sup>d</sup>, Kichitaro Nakajima<sup>d</sup>, Tomoya Wadayama<sup>a</sup>, Hideki Hayakawa<sup>a</sup>, Kousuke Baba<sup>a</sup>, Kotaro Ogawa<sup>a</sup>, Toshihide Takeuchi<sup>e</sup>, Shaymaa Mohamed Mohamed Badawy<sup>a,f</sup>, Shigeo Murayama<sup>g</sup>, Seiichi Nagano<sup>a</sup>, Yuji Goto<sup>d</sup>, Yohei Miyanoiri<sup>h</sup>, Yoshitaka Nagai<sup>e</sup>, Hideki Mochizuki<sup>†,a,\*</sup>, and Kensuke Ikenaka<sup>†,a,\*</sup>

†Equal correspondence

<sup>1</sup>Equal contribution

<sup>a</sup> Department of Neurology, Osaka University Graduate School of Medicine, 2-2 Yamadaoka, Suita, Osaka 565-0871, Japan

<sup>b</sup> Lipidome Lab Co., Ltd, Akita-city, Akita 010-0825, Japan.

<sup>c</sup> Department of Biotechnology, Graduate School of Engineering, Osaka University, 2-1 Yamadaoka, Suita, Osaka 5650871, Japan.

<sup>d</sup> Global Center for Medical Engineering and Informatics, Osaka University, Japan, 2-1 Yamadaoka, Suita, Osaka 565-0871, Japan

<sup>e</sup> Department of Neurology, Kindai University, 3-4-1 Kowakae, Higashiosaka City, Osaka 577-8502, Japan

<sup>f</sup> Department of Agricultural Biochemistry, Faculty of Agriculture, Zagazig University, Zagazig, Egypt.

<sup>g</sup> Brain Bank for Neurodevelopmental, Neurological and Psychiatric Disorders, United Graduate School of Child Development, Osaka University, 2-2, Yamadaoka, Suita, Osaka, 565-0871, Japan.

<sup>h</sup> Institute for Protein Research, Osaka University, 3-2 Yamadaoka, Suita, Osaka 565-0871, Japan

\* Kensuke Ikenaka, Hideki Mochizuki

**Email:** [ikenaka@neuro.med.osaka-u.ac.jp](mailto:ikenaka@neuro.med.osaka-u.ac.jp)

**Postal address:** Department of Neurology, Yamadaoka 2-2, Suita, Osaka 565-0871, Japan.

**Tel:** +81-06-6879 3571; **Fax:** +81-06-6879 3579.

## Supplementary figures

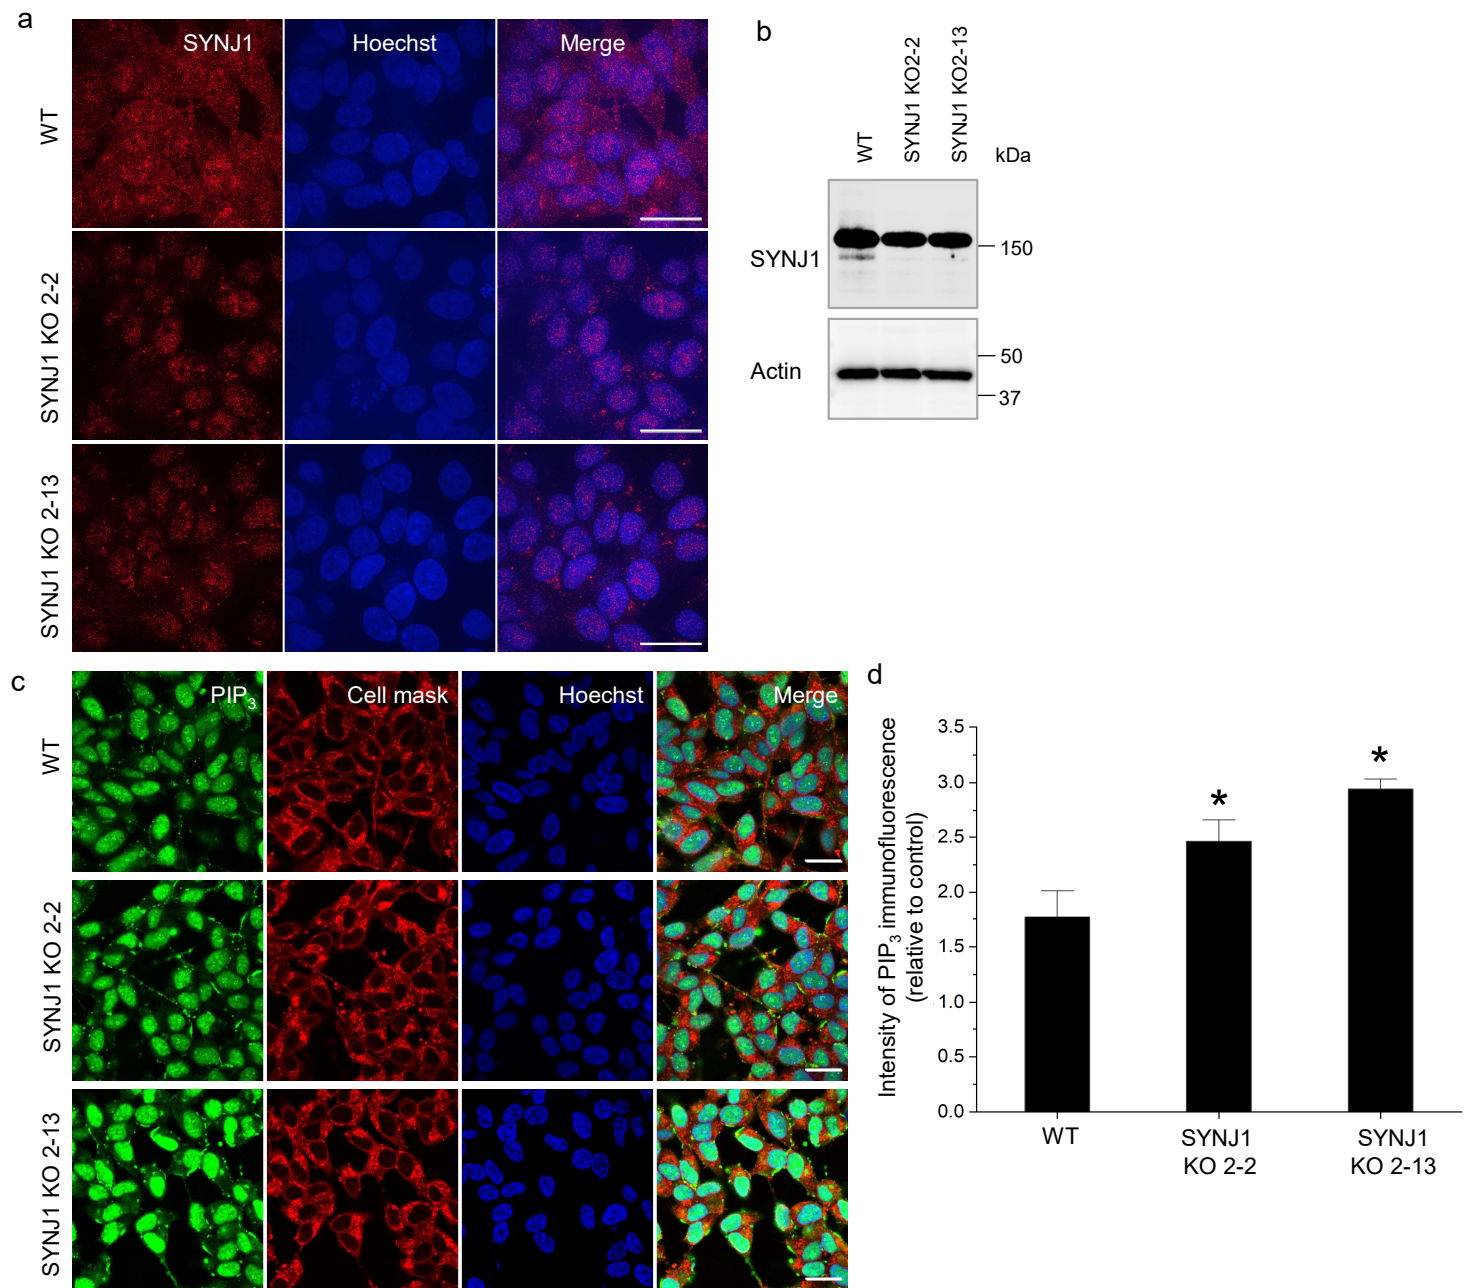

**Supplementary Fig. 1** Characterization of SH-SY5Y SYNJ1 knockout clones. **(a)** Verification of SYNJ1 knockout clones by immunofluorescence staining (Scale bar = 20  $\mu$ m) and **(b)** immunoblot analysis. **(c)** Immunofluorescence staining of PIP<sub>3</sub> in control SH-SY5Y and SYNJ1 knockout clones. Scale bar = 20  $\mu$ m. **(d)** The intensity of PIP<sub>3</sub> immunofluorescence was significantly increased in the cytoplasmic region of SYNJ1 KO clones. Data are presented as the mean  $\pm$  SEM ( $n = 3$ ); one-way ANOVA followed by Dunnett's post hoc test compared to control; \* $P < 0.05$ .

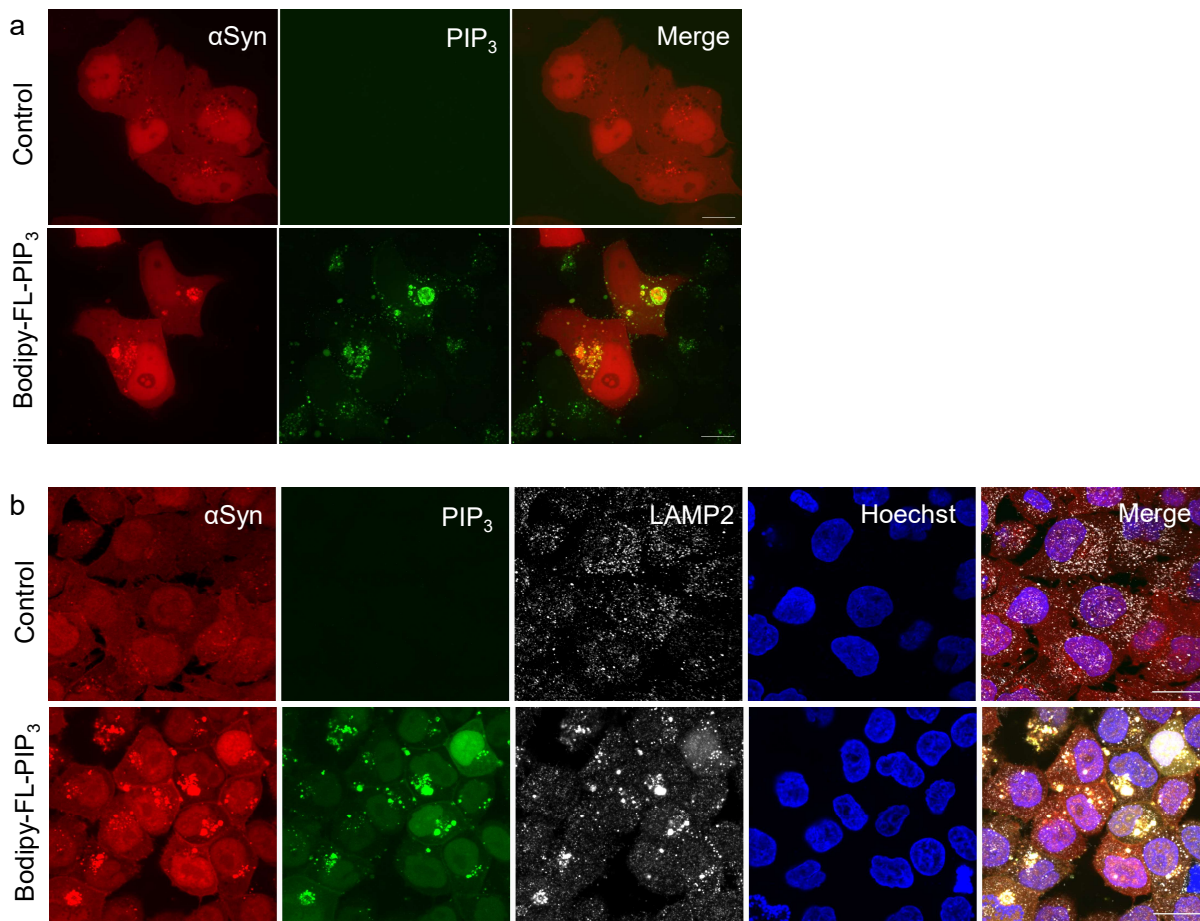

**Supplementary Fig. 2** (a) Delivery of PIP<sub>3</sub> into HeLa cells transiently overexpressing αSyn. Representative confocal images of HeLa transiently overexpressing αSyn mRFP (red) treated with BODIPY-PIP<sub>3</sub> (green) using histone carrier. Scale bar = 10 μm. (b) Staining of control and Bodipy-FL®PIP<sub>3</sub> (green)-treated HeLa-αSyn mRFP (red) cells with lysosomal marker LAMP2 (grey). Cells are counterstained for nuclei with Hoechst (blue). Scale bar = 20 μm.



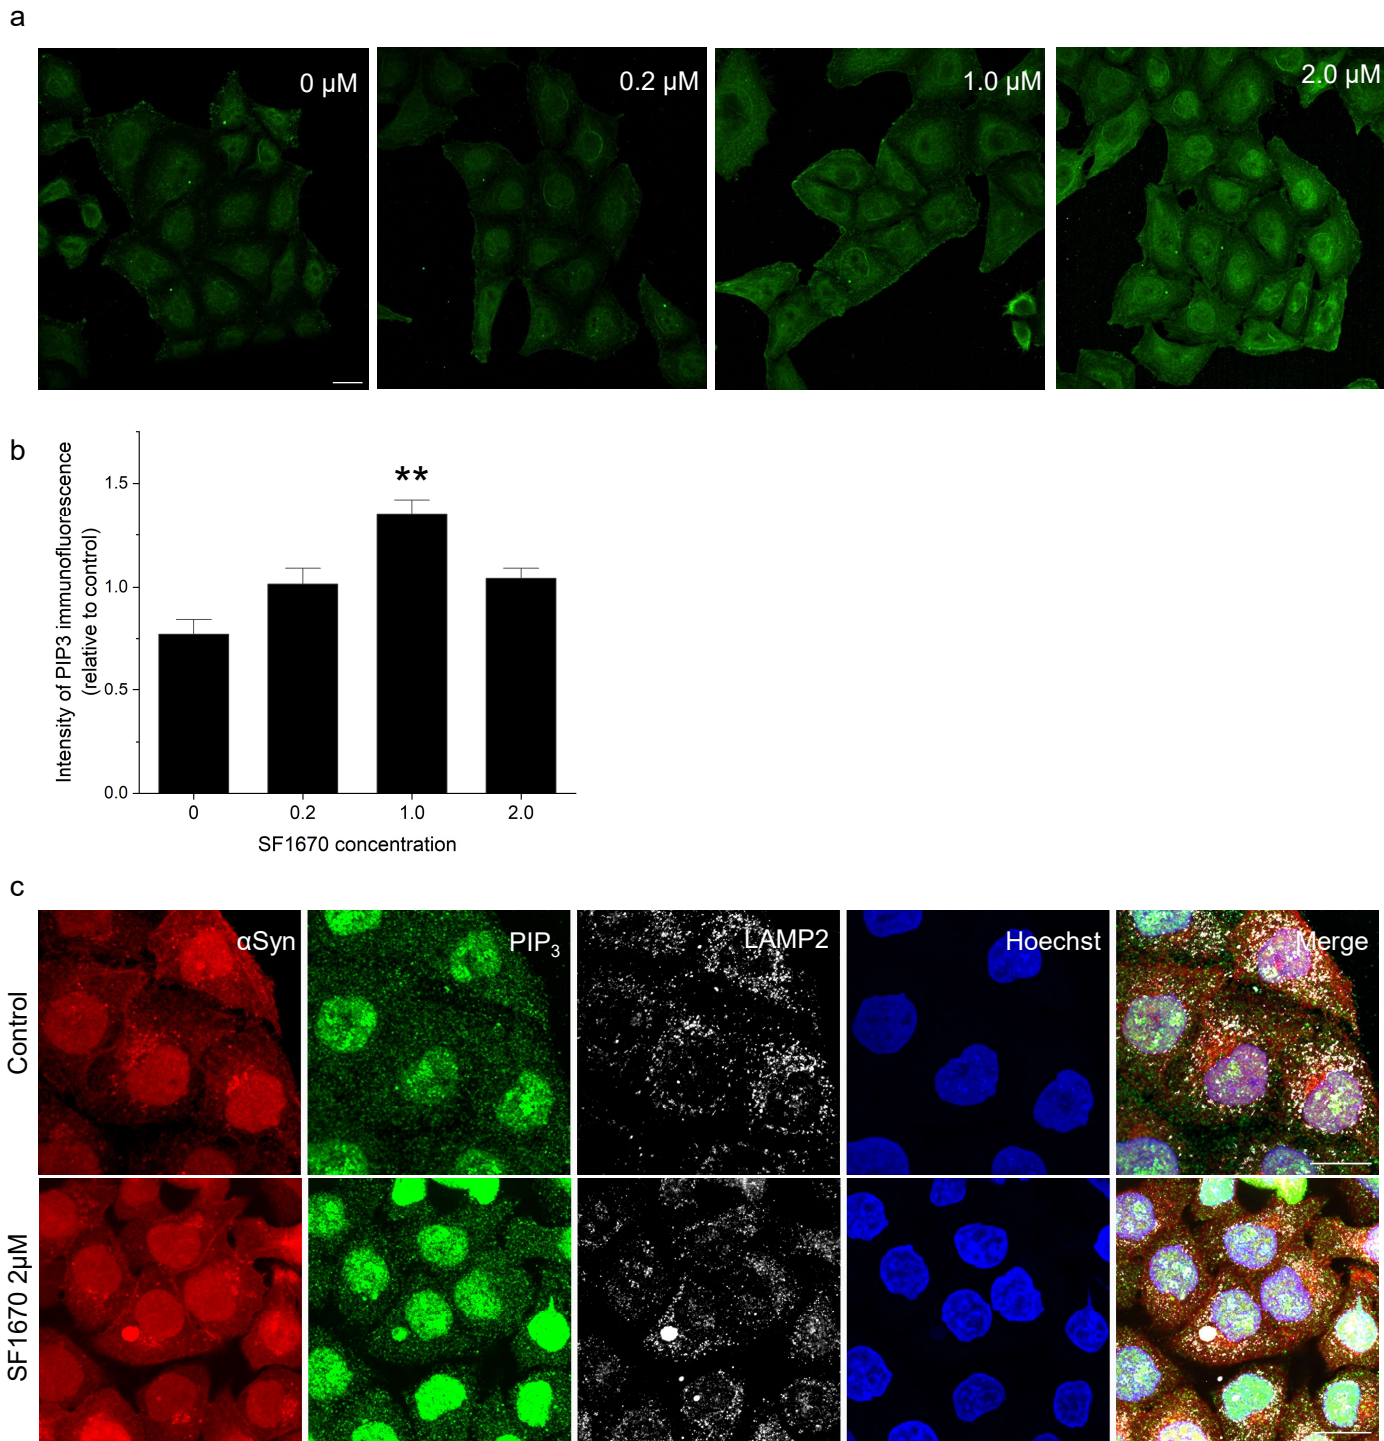

**Supplementary Fig. 3** SF1670-induced upregulation of cellular PIP<sub>3</sub> level. **(a)** Representative images showing immunofluorescence of PIP<sub>3</sub> with each drug concentration. Scale bar = 10 μm. **(b)** Intensity of PIP<sub>3</sub> immunofluorescence was significantly increased following SF1670 treatment. Data are presented as the mean ± SEM (*n* = 3); one-way ANOVA followed by Dunnett's post hoc test compared to control; \*\**P* < 0.01. **(c)** Double immunofluorescence staining of PIP<sub>3</sub> (green) and LAMP2 (grey) in control and SF1670-treated HeLa-αSyn-mRFP cells (red). Cells are counterstained for nuclei with Hoechst (blue). Scale bar = 20 μm.

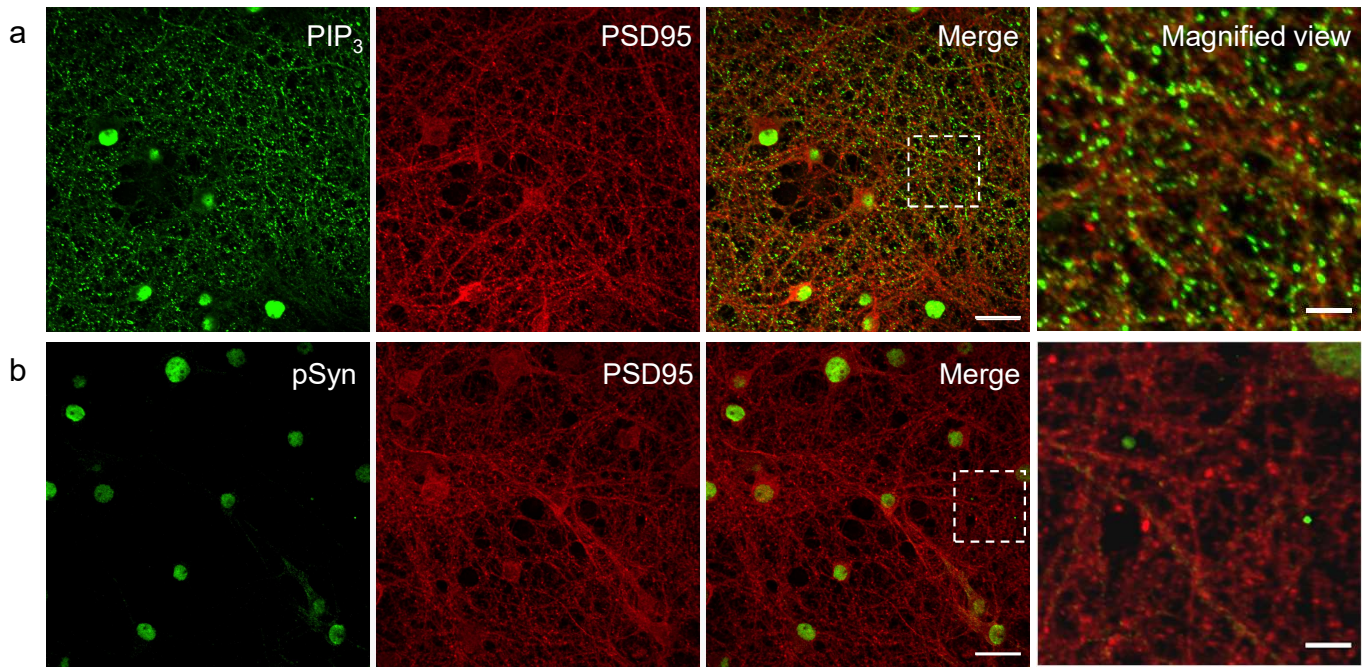

**Supplementary Fig. 4** Assessment of postsynaptic localization of (a) PIP<sub>3</sub> and (b) pSyn (green) by co-staining with postsynaptic marker PSD95 (red). Scale bar = 10  $\mu$ m. Magnified views of dashed boxed area are shown in the right panel. Scale bar = 5  $\mu$ m.

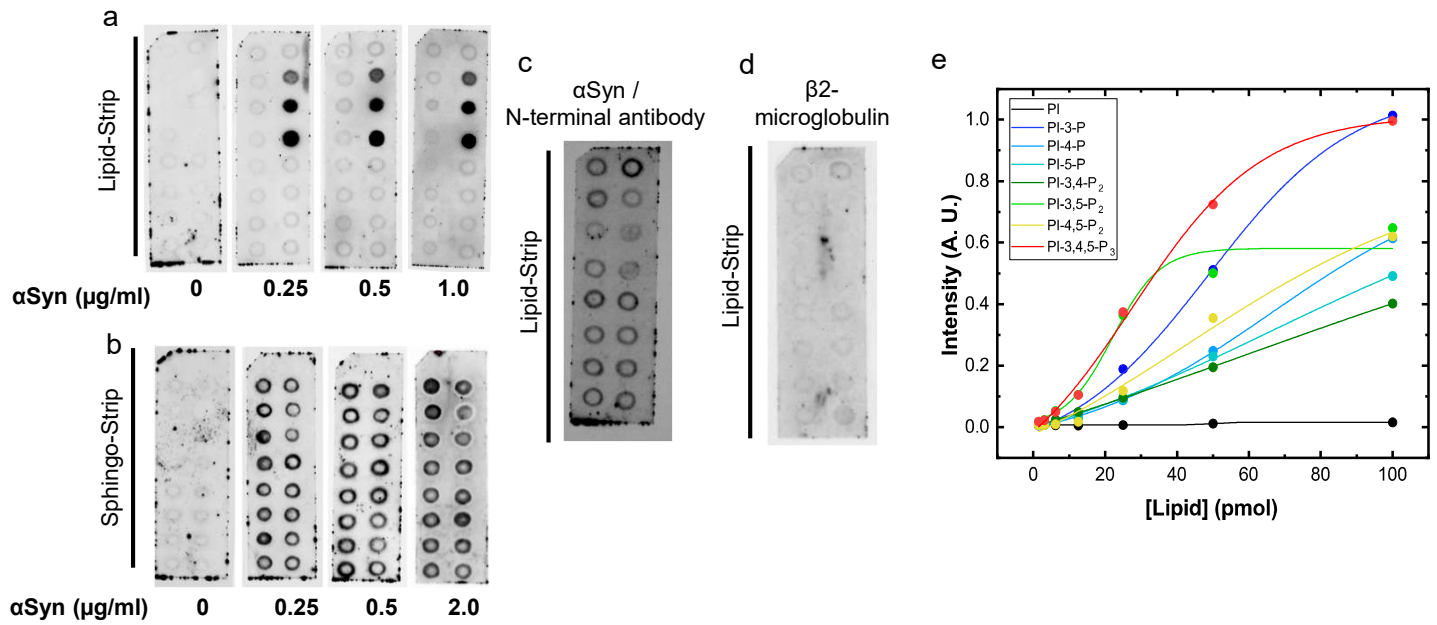

**Supplementary Fig. 5** Lipid-binding profile of different proteins to lipid strip. **(a, b)** Four different concentrations of  $\alpha$ Syn are evaluated for **(a)** lipid strip and **(b)** Sphingo strip. **(c)** Lipid-strip incubated with 1.0  $\mu\text{g/mL}$  of  $\alpha$ Syn and detected using a monoclonal antibody F-11 recognizing the N-terminus of  $\alpha$ Syn. **(d)** Lipid-strip incubated with  $\beta$ 2-macroglobulin at the concentration of 1.0  $\mu\text{g/mL}$ . **(e)** Representative example of the fitting of the experimental intensities obtained from the PIP array (dots) to the Boltzmann equation model (lines) to determine the parameter of binding  $[\text{Lipid}]_{50\%}$ .

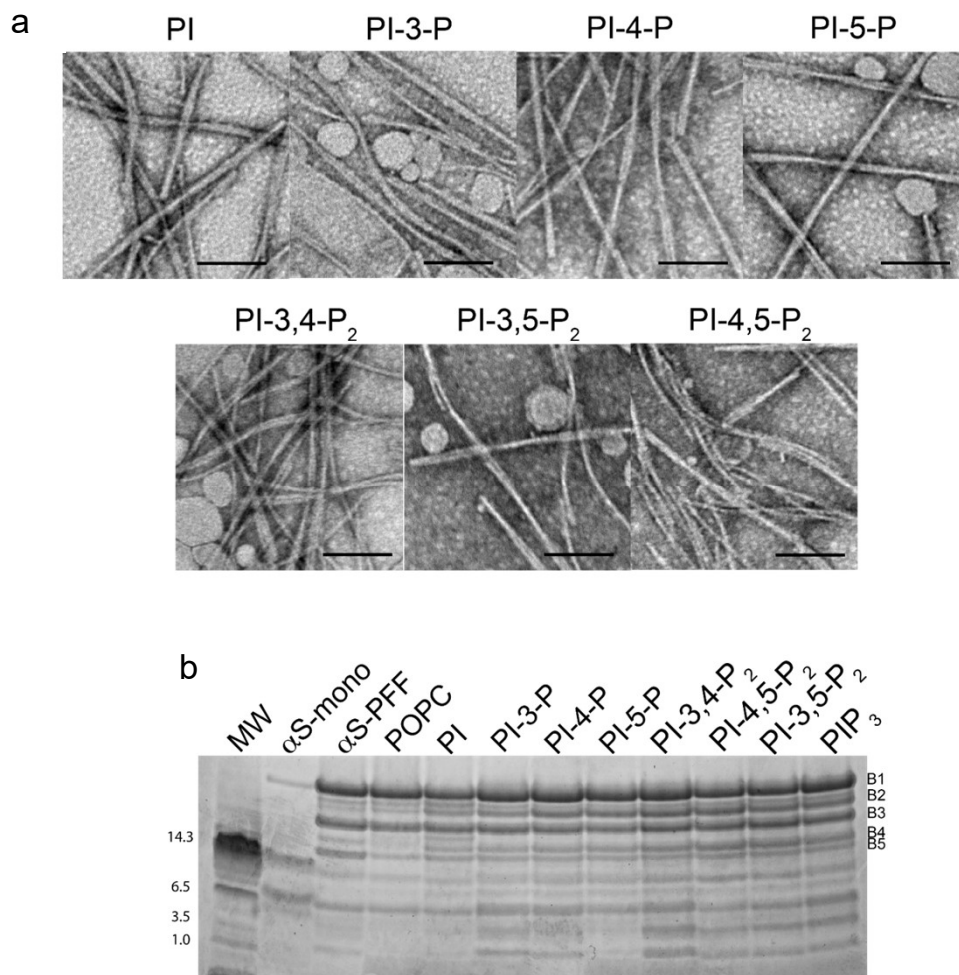

**Supplementary Fig. 6** Conformation and biochemical characteristics of  $\alpha$ Syn fibrils formed in the presence of POPC-phosphatidylinositol-derived vesicles. **(a)** TEM visualization of  $\alpha$ Syn fibrils formed in the presence of phosphatidylinositol (PI) and mono- and di-phosphorylated phosphatidylinositol. **(b)** Proteinase K resistance assay of  $\alpha$ Syn monomers ( $\alpha$ S-mono) and preformed fibrils ( $\alpha$ S-PFF), followed by the fibrils obtained in panel A. Bands numbered from B1 to B5 are employed for analysis and comparison.



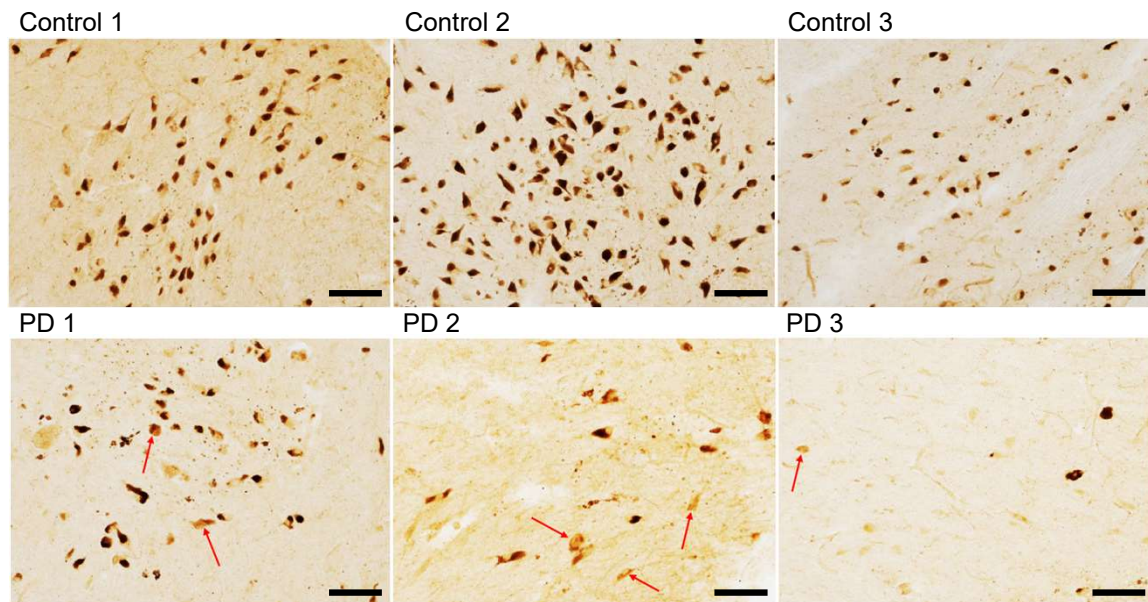

**Supplementary Fig. 7** Immunohistochemical staining of PIP<sub>3</sub> (without Nissl counterstaining) in the substantia nigra of control and PD patients ( $n = 3$  each). The dark brown cells are neuromelanin-containing cells. PIP<sub>3</sub> accumulations are highlighted by red arrows. Scale bar = 100  $\mu\text{m}$ .



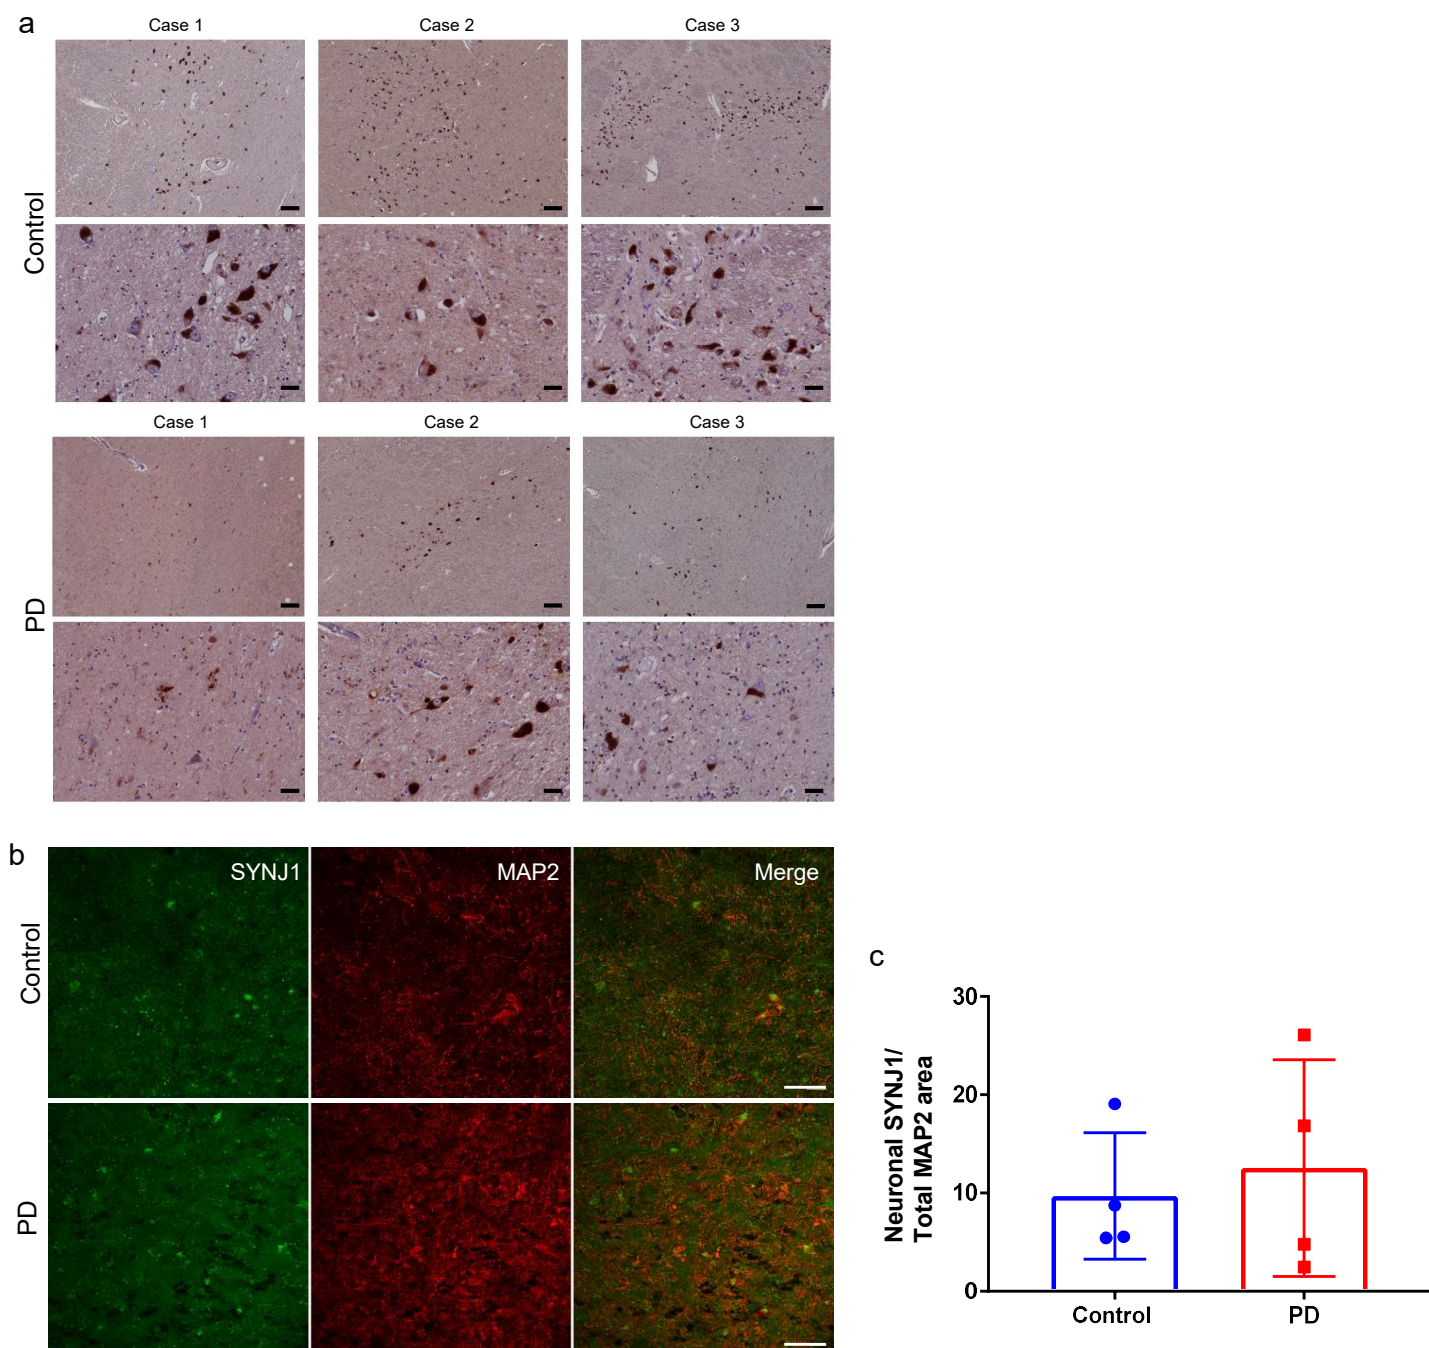

**Supplementary Fig. 8 Analysis of SYNJ1 level in the brain samples of control and PD patients. (a)** Immunohistochemical staining of SYNJ1 with Nissl counterstaining in the substantia nigra of control and PD patients ( $n = 3$  for control;  $n = 3$  for PD). The dark brown cells are neuromelanin-containing cells. Scale bar = 100  $\mu\text{m}$  for low magnification images and 25  $\mu\text{m}$  for high magnification images. **(b)** Double immunofluorescence staining of SYNJ1 and MAP2 in the brain samples of control and PD patients. Scale bar = 50  $\mu\text{m}$ . **(c)** Quantitative analysis of neuronal SYNJ1 intensity per unit area of MAP2. Data are expressed as the mean  $\pm$  SEM ( $n = 4$  for control;  $n = 4$  for PD).
